# Supplementary material
Source: Royal Society of Chemistry journal article supplement (doi:10.1039/d6nj00317f)
Supplement: d6nj00317f1.pdf [file d6nj00317f1.pdf]

## Supplementary Information

### A composite $\text{ZnIn}_2\text{S}_4@\text{ZrDP}$ : preparation and high catalytic activities in some photodegradation reactions

Shan Fu<sup>a,†</sup>, Yi Tian<sup>a,†</sup>, Xin Long<sup>a</sup>, Kefeng Wang<sup>b,\*</sup>, Junyu Lei<sup>b</sup>, Long Lin<sup>b</sup>, Haijun Hao<sup>a,\*</sup>, Qinghong Xu<sup>a</sup>, \*

<sup>a</sup>College of Chemistry, Beijing University of Chemical Technology, Beijing, 100029, P.R. China

<sup>b</sup>Petrochemical Research Institute, PetroChina Company Limited, Beijing 100195, China

†The authors contribute equally to the paper

\*Corresponding authors. E-mail: [xuqh@mail.buct.edu.cn](mailto:xuqh@mail.buct.edu.cn), [hjhao@mail.buct.edu.cn](mailto:hjhao@mail.buct.edu.cn) and [wangkefeng010@petrochina.com.cn](mailto:wangkefeng010@petrochina.com.cn)

 0000-0002-6369-3540

## **Content:**

**Fig. S1** NMR spectra of  $^1\text{H}$  of DOTMP.

**Fig. S2** Structure diagram of ZrDP and Cu@ZrDP.

**Fig. S3** Recycling test plot (A) and kinetic linear fitting plot on degradation of RhB (B).

**Fig. S4** XRD spectra of  $\text{ZnIn}_2\text{S}_4@\text{ZrDP}$  before (a) and after (b) recycling.

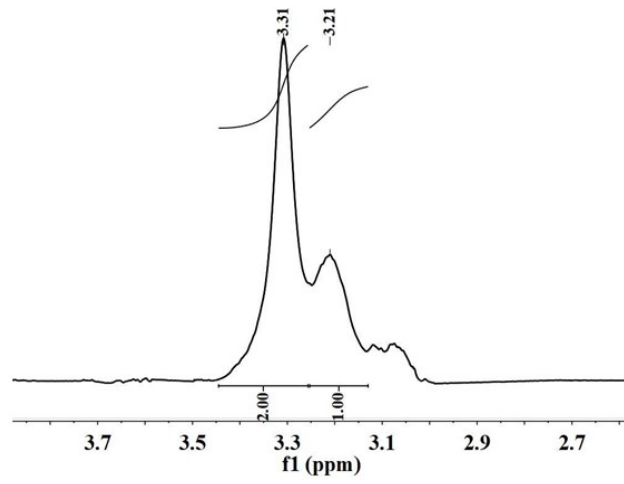

**Fig. S1** NMR spectra of  $^1\text{H}$  of DOTMP.

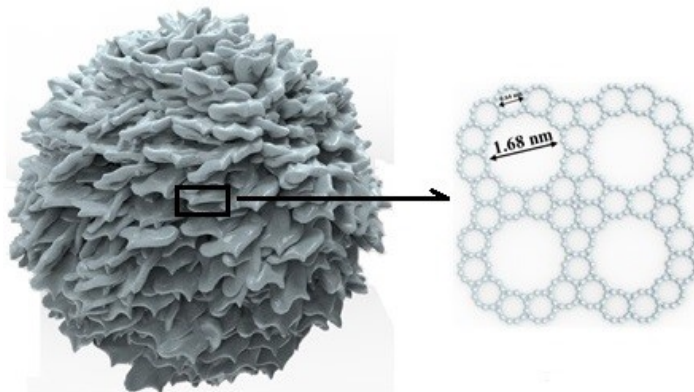

**Fig. S2** Structure diagram of ZrDP and Cu@ZrDP.

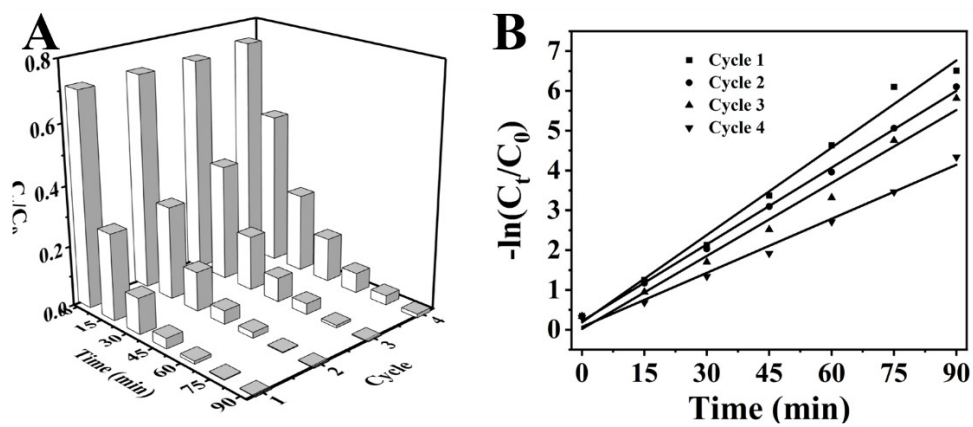

**Fig. S3** Recycling test plot (A) and kinetic linear fitting plot on degradation of RhB (B).

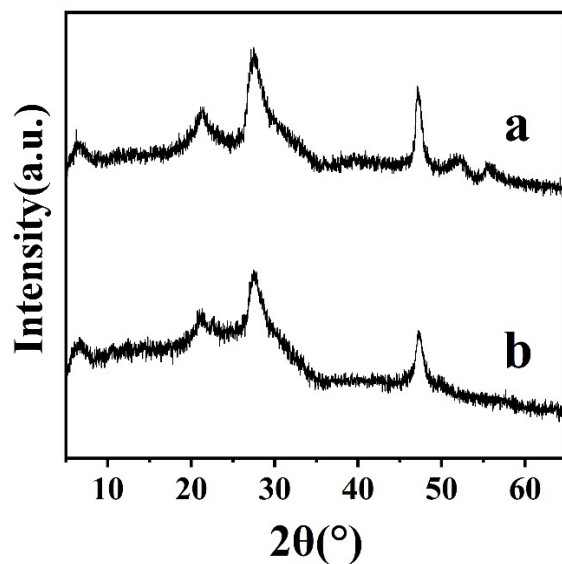

**Fig. S4** XRD spectra of  $ZnIn_2S_4@ZrDP$  before (a) and after (b) recycling.
